# Supplementary material for: No clear benefit of preventive cranial radiotherapy in childhood Philadelphia-positive acute lymphoblastic leukemia: a retrospective analysis of the EsPhALL2010 study
Source: PubMed Central journal article supplement — Haematologica. 2024 Jul 18;109(11):3766–70. doi: 10.3324/haematol.2024.285253 (PMC11532704; doi:10.3324/haematol.2024.285253), 2024-07-18
Supplement: 2024_285253_CONTER_SUPPL.pdf [file 2024_285253_CONTER_SUPPL.pdf]

# No clear benefit of preventive cranial radiotherapy in childhood Philadelphia-positive acute lymphoblastic leukemia: a retrospective analysis of the EsPhALL2010 study

## Authors

---

Valentino Conter,<sup>1\*</sup> Maria Grazia Valsecchi,<sup>2,3\*</sup> Paola De Lorenzo,<sup>1,2</sup> Virginie Gandemer,<sup>4</sup> Mats Heyman,<sup>5</sup> Vaskar Saha,<sup>6,7</sup> Paulina Diaz,<sup>8,9</sup> Chi-Kong Li,<sup>10</sup> Andishe Attarbaschi,<sup>11,12</sup> Gabriele Escherich,<sup>13</sup> Jan Stary,<sup>14</sup> Martin Schrappe,<sup>15</sup> Rob Pieters,<sup>16</sup> Gunnar Cario<sup>15#</sup> and Andrea Biondi<sup>1,3#</sup>

<sup>1</sup>Pediatrics and Tettamanti Center, Fondazione IRCCS San Gerardo dei Tintori, Monza, Italy; <sup>2</sup>Biostatistics and Clinical Epidemiology, Fondazione IRCCS San Gerardo dei Tintori, Monza, Italy; <sup>3</sup>School of Medicine and Surgery, University of Milano-Bicocca, Milano, Italy; <sup>4</sup>Department of Pediatric Hemato-Oncology, University Hospital of Rennes, Rennes, France; <sup>5</sup>Department of Paediatric Oncology, Karolinska University Hospital and Department of Women's and Children's Health, Karolinska Institutet, Stockholm, Sweden; <sup>6</sup>Division of Cancer Sciences, School of Medical Sciences, Faculty of Biology, Medicine and Health, University of Manchester, Manchester, UK; <sup>7</sup>Tata Translational Cancer Research Centre, Tata Medical Center, Kolkata, India; <sup>8</sup>Chilean National Pediatric Oncology Group, Santiago, Chile; <sup>9</sup>Hospital Dr. Gustavo Fricke, Viña del Mar, Chile; <sup>10</sup>The Chinese

University of Hong Kong, Hong Kong Children's Hospital, Hong Kong SAR, China; <sup>11</sup>Department of Pediatric Hematology and Oncology, St. Anna Children's Hospital, Medical University of Vienna, Vienna, Austria; <sup>12</sup>St. Anna Children's Cancer Research Institute, Vienna, Austria; <sup>13</sup>University Medical Centre Hamburg-Eppendorf, Clinic of Paediatric Haematology and Oncology, Hamburg, Germany; <sup>14</sup>Department of Pediatric Hematology and Oncology, Second Faculty of Medicine, Charles University and University Hospital Motol, Prague, Czech Republic; <sup>15</sup>University Medical Center Schleswig-Holstein, Pediatrics, Campus Kiel, Kiel, Germany and <sup>16</sup>Princess Máxima Center for Pediatric Oncology, Utrecht, The Netherlands

*\*VC and MVG contributed equally as first authors.*

*#GC and AB contributed equally as senior authors.*

Correspondence:

A. BIONDI - andrea.biondi@unimib.it

<https://doi.org/10.3324/haematol.2024.285253>

**No clear benefit of preventive cranial radiotherapy in childhood Philadelphia-positive acute lymphoblastic leukemia: a retrospective analysis of the EsPhALL2010 study**

Valentino Conter et al.

**Supplementary material**

|                                                  | <b>N.<br/>pts.</b> | <b>N.<br/>events</b> | <b>5-year EFS (SE)</b> | <b>95% CI</b> | <b>p-value</b> |
|--------------------------------------------------|--------------------|----------------------|------------------------|---------------|----------------|
| <b>Patients analysed</b>                         | <b>66</b>          | <b>25</b>            |                        |               |                |
| <b>ALL consortia</b>                             |                    |                      |                        |               | <i>0.8535</i>  |
| AIEOP/BFM                                        | <b>31</b>          | 11                   | 59.6 (9.8)             | 38.1 – 75.8   |                |
| ALLTogether                                      | <b>35</b>          | 14                   | 56.5 (9.0)             | 37.3 – 71.8   |                |
| <b>Gender</b>                                    |                    |                      |                        |               | <i>0.0998</i>  |
| Male                                             | <b>41</b>          | 13                   | 63.6 (8.4)             | 44.9 – 77.4   |                |
| Female                                           | <b>25</b>          | 12                   | 48.5 (10.5)            | 27.1 – 66.9   |                |
| <b>Age at diagnosis, years</b>                   |                    |                      |                        |               | <i>0.9299</i>  |
| < 4 years                                        | <b>13</b>          | 6                    | 52.8 (14.1)            | 23.4 – 75.5   |                |
| 4 - <10 years                                    | <b>29</b>          | 10                   | 59.6 (10.5)            | 36.5 – 76.7   |                |
| ≥10 years                                        | <b>24</b>          | 9                    | 59.4 (10.7)            | 35.8 – 76.8   |                |
| <b>WBC at diagnosis, ×10<sup>9</sup> cells/L</b> |                    |                      |                        |               | <i>0.0559</i>  |
| < 50                                             | <b>35</b>          | 9                    | 68.2 (9.1)             | 46.9 – 82.4   |                |
| 50 - <100                                        | <b>16</b>          | 8                    | 48.1 (12.9)            | 22.4 – 70.0   |                |
| ≥100                                             | <b>15</b>          | 8                    | 44.0 (13.3)            | 18.5 – 67.1   |                |
| <b>NCI criteria</b>                              |                    |                      |                        |               | <i>0.0408</i>  |
| Standard risk                                    | <b>20</b>          | 4                    | 74.8 (11.2)            | 44.9 – 90.0   |                |
| High risk                                        | <b>46</b>          | 21                   | 50.7 (7.9)             | 34.5 – 64.8   |                |
| <b>CNS-Involvement</b>                           |                    |                      |                        |               |                |
| Yes                                              | <b>4</b>           | 2                    | -                      | -             | -              |
| No                                               | <b>62</b>          | 23                   | 58.7 (6.8)             | 44.2 – 70.7   |                |

**Supplementary Table 1. 5-year event-free survival (EFS) of 66 patients on chemotherapy at the end of Delayed Intensification I, by baseline covariates.** WBC= white blood cell count; NCI criteria: standard risk= patients with WBC<50 ×10<sup>9</sup>/L and age <10 years; high risk= all other patients; CNS= central nervous system. p-value from log-rank test.

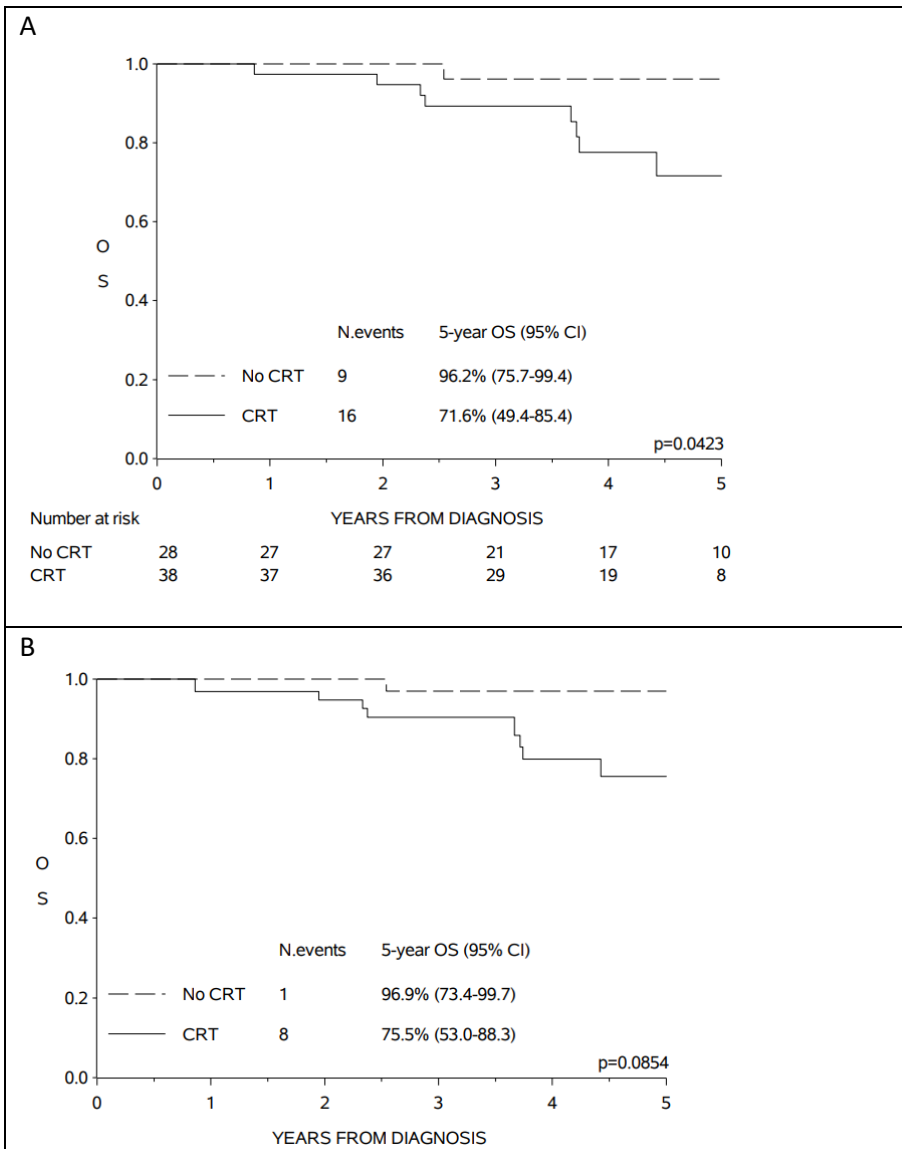

**Supplementary Figure 1. Estimate of overall survival (OS) according to the standard Kaplan-Meier approach (A) and to the weighted Kaplan-Meier approach based on the inverse probability of treatment (B), by cranial radiotherapy (CRT) administration.** The initial plateau in the curves reflects the fact that all 66 patients included in the analysis were still alive in complete remission and on protocol chemotherapy at the planned time of CRT administration (i.e. the end of Delayed Intensification I, about 7 months after diagnosis).

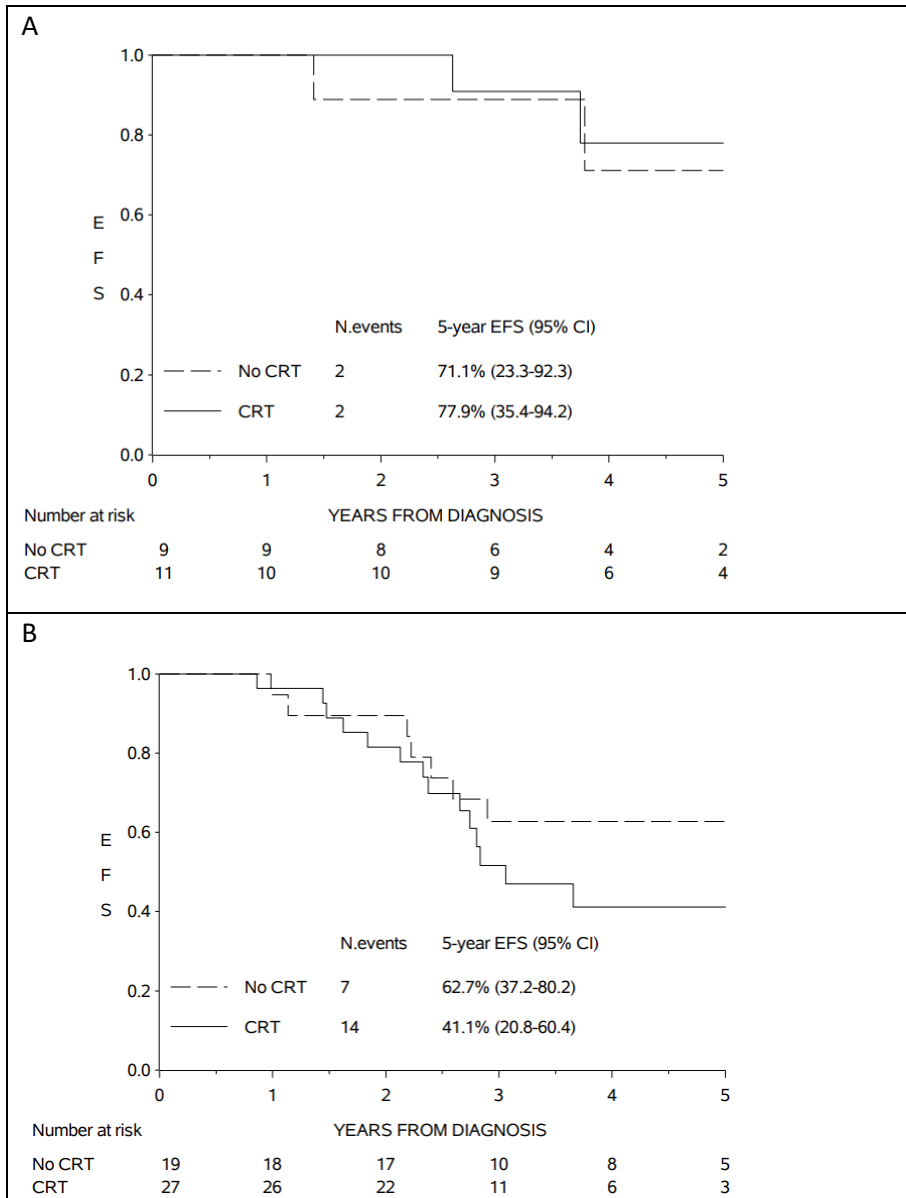

**Supplementary Figure 2. Standard Kaplan-Meier estimates of event-free survival (EFS) in NCI standard risk (A) and high risk (B) patients by cranial radiotherapy (CRT) administration.** NCI criteria: standard risk= patients with white blood cell count  $<50 \times 10^9/L$  and age  $<10$  years; high risk= all other patients. The initial plateau in the EFS curve reflects the fact that all 66 patients included in the analysis were still in complete remission and on protocol chemotherapy at the planned time of CRT administration (i.e. the end of Delayed Intensification I, about 7 months after diagnosis).
